## Long-term follow-up of thoracoscopic ablation for long-standing persistent atrial fibrillation

N. Harlaar<sup>1</sup>, M.A.P. Oudeman<sup>2</sup>, S.A. Trines<sup>3</sup>, G.S. De Ruiter<sup>4</sup>, M. Khan<sup>4</sup>, K. Zeppenfeld<sup>3</sup>, A. Tjon<sup>2</sup>, J. Braun<sup>5</sup>, T.J. Van Brakel<sup>5</sup>

<sup>1</sup>Leiden University Medical Center, Cardiology and Cardiothoracic Surgery, Leiden, Netherlands (The); <sup>2</sup>Hospital Onze Lieve Vrouwe Gasthuis, Cardiothoracic Surgery, Amsterdam, Netherlands (The); <sup>3</sup>Leiden University Medical Center, Cardiology, Leiden, Netherlands (The); <sup>4</sup>Hospital Onze Lieve Vrouwe Gasthuis, Cardiology, Amsterdam, Netherlands (The); <sup>5</sup>Leiden University Medical Center, Cardiothoracic Surgery, Leiden, Netherlands (The)

**Funding Acknowledgement:** Type of funding source: None

**Background:** Catheter ablation in patients with long-standing persistent AF (LSPAF) remains challenging and often requires repeated procedures with variable results. We report long-term outcomes of a bipolar thoracoscopic pulmonary vein and left atrial posterior wall ablation for LSPAF, and compare continuous and interval rhythm monitoring.

**Methods:** Seventy-seven LSPAF patients who underwent thoracoscopic pulmonary vein and box isolation between 2009–2017 in two Dutch centers were included. Follow-up consisted of continuous rhythm monitoring using an implanted loop recorder or 24-h Holter at 3/6/12/24/60 months.

**Results:** Mean age was 59±8 years with a median AF duration of 3.8 [1.2–6.3] years. In the total cohort, at 2-year follow-up, 86.0% of patients were in sinus rhythm, 12.3% were in paroxysmal AF and 1.6% in persistent AF. At 5 years, 62.9% of patients were in sinus rhythm, 20.0% in paroxysmal AF, 14.3% in persistent AF and 2.9% was experiencing atrial flutter. Con-

tinuous rhythm monitoring was performed in 46% of patients. Comparing continuous and interval rhythm monitoring, freedom from any atrial arrhythmia episode at 2- and 5 years was 60.0% and 49.9% in the continuous group and 93.8% and 51.9% in the interval monitoring group, respectively ( $p=0.02$ , Breslow-Wilcoxon test). In patients with continuous rhythm monitoring the mean atrial arrhythmia burden was reduced from 99.1% preoperatively to 0.1% at the end of the blanking period and 7.3% at 2-year follow-up.

**Conclusions:** Thoracoscopic box ablation is highly effective in restoring sinus rhythm at medium term follow-up. However, it is not a curative treatment as demonstrated by the 50% arrhythmia-free survival at long-term follow-up. Whether this is due to the progressive nature of AF needs further investigation. Continuous rhythm monitoring shows earlier recurrence detection with a potential early treatment adaptation.
